# Supplementary material for: Trajectories of Perinatal Maternal Mental Health and Associations with Child Health Outcomes at 3 years of Age in the ORIGINS Cohort
Source: Research Square preprint supplement (doi:10.21203/rs.3.rs-8518165/v1), 2026-01-16
Supplement: Supplementary file 1 [file 805437b6065facd8f07bffc7.docx]

**Supplemental Online Content**

**eMethods**

**eReferences**

**eTable 1.** Characteristics of Those Included in the Trajectory Analyses

**eTable 2.** Baseline Characteristics of Participants Included in the Trajectory Analyses by Completeness

**eResults**

**eTable 3.** Model Fit and Diagnostic Criteria Used in the Selection of the Final Number of Classes

**eTable 4.** Trajectory Shapes, Model Fit and Diagnostic Criteria for the Final Model Trajectories

**eTable 5.** Descriptive Statistics of DASS Scores at Each Timepoint for Each Trajectory Class

**eTable 6.** Characteristics of Those Included and Excluded from the Conners Analyses

**eTable 7.** Univariate Association of Covariates with Offspring Conners Domains

**eTable 8.** Unadjusted Associations of Maternal DASS Trajectories with Offspring Conners Domains

**eMethods**

**Methodology used in the Trajectory Analyses**

The first step in the statistical analysis was to identify and describe the trajectories for each of the DASS subscales of depression, anxiety and stress. The guidelines for reporting on latent trajectory studies1 were followed in the selection of the optimal model and in the reporting of the results.

Trajectories were modelled for each of the DASS subscales. Data were assumed to be missing at random and hence maximum likelihood estimations provide parameter estimates that are asymptotically unbiased2. Time was measured in months and scaled by a factor of 0.1 to improve the computational accuracy of the maximum likelihood calculations3. All the DASS subscales were skewed with clustering of data at the scale minimum of zero. Hence, trajectories were modelled using the censored normal distribution4. Latent class growth analysis (LCGA) was performed using the Stata traj plug in5 initially using a fixed effects, common residual variance model. As recommended, alternative specifications of within class heterogeneity and residual and variance structures were also considered1. A second LCGA model was examined, with class specific residual variances. To verify that the trajectory solutions were not local, the models were run 30 times with different random starting values.

Next, progressively more complex latent growth mixture models were fitted using the Mplus package. These ranged from random intercept to random intercept, slope and quadratic under common versus class specific variances and residual structures. To establish global maxima and avoid solutions based on local maxima 200 sets of random start values were implemented and the best 50 of these starts were kept for final stage optimisation.

For all models under consideration a quadratic shape was initially assumed to allow for curvature, and models were progressively fitted with an increase in the number of classes, starting at one. The final number of classes for each model was determined by considering the Bayesian Information Criterion (BIC), the proportion of cohort members in each class, which should be no less than 5% in the smallest class6, the goals of analysis, clinical applications and model adequacy3. As the BIC may improve with each additional class up to a saturated model, a plateauing effect of the BIC was also considered in the decision to stop adding classes to the model7. Model adequacy was assessed using four diagnostic criteria: 1) the average posterior probabilities for each group exceeds 70%, 2) the odds of correct classification for each class exceeds 5, 3) the proportion of the sample assigned to each group is close to the proportion estimated from the model and 4) 95% confidence intervals (CI) of the estimated proportions are reasonably narrow3. All the above mentioned criteria were also used to compare models, and the optimal model was selected. Following this, the trajectory shape for each class was determined by systematically reducing the order of the polynomial for each class until the parameter estimate for the highest degree polynomial had a *P* value of <.05. This was then the final model and participants were assigned to the latent class for which they had the largest posterior probability of membership.

Data was analysed using Stata version 16 (StataCorp, College Station, Texas) and Mplus version 8.118.

**eReferences**

1. van de Schoot R, Sijbrandij M, Winter SD, et al. The GRoLTS-Checklist: Guidelines for Reporting on Latent Trajectory Studies. *Structural Equation Modeling* 2017; 24: 451-467. DOI: 10.1080/10705511.2016.1247646.

2. Nagin DS and Odgers CL. Group-Based Trajectory Modeling in Clinical Research. *Annual Review of Clinical Psychology* 2010; 6: 109-138. DOI: <https://doi.org/10.1146/annurev.clinpsy.121208.131413>.

3. Nagin D. *Group-based modeling of development*. Harvard University Press, 2005.

4. Jones BL, Nagin DS and Roeder K. A SAS procedure based on mixture models for estimating developmental trajectories. *Sociological methods & research* 2001; 29: 374-393.

5. Jones BL and Nagin DS. A note on a Stata plugin for estimating group-based trajectory models. *Sociological Methods & Research* 2013; 42: 608-613.

6. Nylund KL, Asparouhov T and Muthén BO. Deciding on the Number of Classes in Latent Class Analysis and Growth Mixture Modeling: A Monte Carlo Simulation Study. *Structural equation modeling* 2007; 14: 535-569. DOI: 10.1080/10705510701575396.

7. Petras H, Masyn K, Piquero AR, et al. General Growth Mixture Analysis with Antecedents and Consequences of Change. New York, NY: Springer New York, 2010, pp.69-100.

8. Muthén LK and Muthén BO. Mplus user’s guide (Eighth). *Muthén & Muthén* 2017.

**eTable 1. Characteristics of Those Included in the Trajectory Analyses**

|  | **n=1442a** |
| --- | --- |
| Mother’s age at birth of child, mean (SD), years | 32.8 (4.3) |
| Socioeconomic status: IRSAD (quintiles), n (%)b |  |
| 1, most disadvantaged | 71 (4.9%) |
| 2 | 39 (2.7%) |
| 3 | 244 (16.9%) |
| 4 | 543 (37.7%) |
| 5, least disadvantaged | 543 (37.7%) |
| Mother’s education, n (%)c |  |
| High School | 282 (19.7%) |
| Trade/Apprenticeship/Diploma | 290 (20.3%) |
| University degree | 851 (59.6%) |
| Other | 6 (0.4%) |
| Mother’s ethnic origin, n (%)d |  |
| Africa | 27 (1.9%) |
| America | 25 (1.8%) |
| Asia | 117 (8.4%) |
| Australia | 367 (26.2%) |
| Britain | 543 (38.8%) |
| Europe | 179 (12.8%) |
| Ireland | 93 (6.6%) |
| New Zealand | 40 (2.9%) |
| Other | 8 (0.6%) |
| Twin pregnancy, n (%) | 18 (1.2%) |
| Gestation at antenatal timepoint, median (IQR), weeks | 35.1 (34.0-36.7) |
| Age of child at 6 month timepoint, median (IQR), months | 6.1 (6.0-6.4) |
| Age of child at 12 month timepoint, median (IQR), months | 12.1 (11.9-12.4) |
| Age of child at 24 month timepoint, median (IQR), months | 24.1 (23.8-24.3) |

All variables are by pregnancy.

Abbreviations: IRSAD, Index of Relative Socio-Economic Advantage and Disadvantage. This index summarizes information about the economic and social conditions of people and households within an area, including both relative advantage and disadvantage measures.

a 1442 pregnancies, 1381 mothers.

b missing data, n=2.

c missing data, n=13.

dmissing data, n=43; ‘Other’ includes ethnicities not listed separately. Specific categories and cell counts are not shown because small numbers could risk participant identification.

**eTable 2. Baseline Characteristics of Participants Included in the Trajectory Analyses by Completeness**

|  | n | Completea  (4 timepoints) | Incompleteb  (2-3 timepoints) |
| --- | --- | --- | --- |
| **Depression** | 1407 |  |  |
| n |  | 359 (25.5%) | 1048 (74.5%) |
| Mother’s age at birth of child, mean (SD), years |  | 32.9 (4.1) | 32.8 (4.4) |
| Socioeconomic status: IRSAD (quintiles), n (%)c |  |  |  |
| 1, most disadvantaged |  | 21 (5.8%) | 50 (4.8%) |
| 2 |  | 17 (4.7%) | 20 (1.9%) |
| 3 |  | 54 (15.0%) | 185 (17.7%) |
| 4 |  | 131 (36.7%) | 397 (38.0%) |
| 5, least disadvantaged |  | 136 (37.9%) | 394 (37.7%) |
| Mother’s education, n (%)d |  |  |  |
| High School |  | 56 (15.9%) | 219 (21.0%) |
| Trade/Apprenticeship/Diploma |  | 68 (19.3%) | 214 (20.6%) |
| University degree |  | 229 (64.9%) | 602 (57.8%) |
| Other |  | 0 (0.0%) | 6 (0.6%) |
| Mother’s ethnic origin, n (%)e |  |  |  |
| Africa |  | 3 (0.9%) | 23 (2.3%) |
| America |  | 5 (1.4%) | 19 (1.9%) |
| Asia |  | 21 (6.0%) | 93 (9.1%) |
| Australia |  | 73 (20.9%) | 277 (27.2%) |
| Britain |  | 164 (47.0%) | 373 (36.7%) |
| Europe |  | 47 (13.5%) | 131 (12.9%) |
| Ireland |  | 26 (7.4%) | 65 (6.4%) |
| New Zealand |  | 9 (2.6%) | 29 (2.8%) |
| Other |  | 1 (0.3%) | 7 (0.7%) |
| Antenatal DASS score |  |  |  |
| mean (SD) |  | 3.0 (4.7) | 3.2 (4.6) |
| median (IQR) |  | 2 (0-4) | 2 (0-4) |
| **Anxiety** | 1407 |  |  |
| n |  | 360 (25.6%) | 1047 (74.4%) |
| Mother’s age at birth of child, mean (SD), years |  | 32.9 (4.1) | 32.7 (4.4) |
| Socioeconomic status: IRSAD (quintiles), n (%)c |  |  |  |
| 1, most disadvantaged |  | 20 (5.6%) | 49 (4.7%) |
| 2 |  | 16 (4.4%) | 21 (2.0%) |
| 3 |  | 57 (15.8%) | 183 (17.5%) |
| 4 |  | 134 (37.2%) | 393 (37.6%) |
| 5, least disadvantaged |  | 133 (36.9%) | 399 (38.2%) |
| Mother’s education, n (%)d |  |  |  |
| High School |  | 60 (17.0%) | 213 (20.5%) |
| Trade/Apprenticeship/Diploma |  | 71 (20.1%) | 215 (20.7%) |
| University degree |  | 223 (63.0%) | 606 (58.3%) |
| Other |  | 0 (0.0%) | 6 (0.6%) |
| Mother’s ethnic origin, n (%)e |  |  |  |
| Africa |  | 2 (0.6%) | 22 (2.2%) |
| America |  | 5 (1.4%) | 19 (1.9%) |
| Asia |  | 22 (6.3%) | 93 (9.2%) |
| Australia |  | 72 (20.6%) | 286 (28.2%) |
| Britain |  | 163 (46.6%) | 366 (36.1%) |
| Europe |  | 43 (12.3%) | 134 (13.2%) |
| Ireland |  | 31 (8.9%) | 59 (5.8%) |
| New Zealand |  | 11 (3.1%) | 29 (2.9%) |
| Other |  | 1 (0.3%) | 7 (0.7%) |
| Antenatal DASS score |  |  |  |
| mean (SD) |  | 3.5 (4.6) | 3.7 (4.5) |
| median (IQR) |  | 2 (0-4) | 2 (0-6) |
| **Stress** | 1403 |  |  |
| n |  | 364 (25.9%) | 1039 (74.1%) |
| Mother’s age at birth of child, mean (SD), years |  | 32.9 (4.2) | 32.7 (4.4) |
| Socioeconomic status: IRSAD (quintiles), n (%)c |  |  |  |
| 1, most disadvantaged |  | 22 (6.0%) | 47 (4.5%) |
| 2 |  | 13 (3.6%) | 22 (2.1%) |
| 3 |  | 59 (16.2%) | 177 (17.1%) |
| 4 |  | 132 (36.3%) | 399 (38.5%) |
| 5, least disadvantaged |  | 138 (37.9%) | 392 (37.8%) |
| Mother’s education, n (%)d |  |  |  |
| High School |  | 57 (15.9%) | 216 (20.9%) |
| Trade/Apprenticeship/Diploma |  | 70 (19.6%) | 210 (20.4%) |
| University degree |  | 231 (64.5%) | 601 (58.2%) |
| Other |  | 0 (0.0%) | 5 (0.5%) |
| Mother’s ethnic origin, n (%)e |  |  |  |
| Africa |  | 3 (0.8%) | 23 (2.3%) |
| America |  | 5 (1.4%) | 20 (2.0%) |
| Asia |  | 24 (6.8%) | 89 (8.8%) |
| Australia |  | 73 (20.6%) | 282 (28.0%) |
| Britain |  | 160 (45.2%) | 375 (37.2%) |
| Europe |  | 47 (13.3%) | 126 (12.5%) |
| Ireland |  | 29 (8.2%) | 61 (6.0%) |
| New Zealand |  | 11 (3.1%) | 27 (2.7%) |
| Other |  | 2 (0.6%) | 5 (0.6%) |
| Antenatal DASS score |  |  |  |
| mean (SD) |  | 6.5 (5.9) | 6.9 (6.5) |
| median (IQR) |  | 6 (2-10) | 6 (2-10) |

Abbreviations: IRSAD, Index of Relative Socio-Economic Advantage and Disadvantage. This index summarizes information about the economic and social conditions of people and households within an area, including both relative advantage and disadvantage measures.

a DASS data was available for all 4 timepoints.

b DASS data was available for 2 or 3 timepoints only.

c missing data, n=2.

d missing data, n=13.

e missing data, n=43; ‘Other’ includes ethnicities not listed separately. Specific categories and cell counts are not shown because small numbers could risk participant identification.

**eResults**

**The Optimal Model**

A number of models were considered and compared in the trajectory analyses (eMethods in Supplement 1). For all three of the DASS subscales, the optimal model was the LCGA model with class specific residual variances.

**eTable 3. Model Fit and Diagnostic Criteria Used in the Selection of the Final Number of Classes**

|  | **BIC** | **Estimated proportions per classa** | **Assigned membership per class (%)a** | **Average posterior probability per class (%)a** | **Odds of correct classification per classa** | **Entropy** |
| --- | --- | --- | --- | --- | --- | --- |
| **Depression** |  |  |  |  |  |  |
| Number of classes |  |  |  |  |  |  |
| 1 | -9816.5 | 100 | 100 | 100 | n/a | n/a |
| 2 | -9295.0 | 75.3, 24.7 | 77.1, 22.9 | 94.7, 90.2 | 5.9, 28.0 | 0.752 |
| 3 | -9117.2 | 38.5, 38.6, 23.0 | 38.6, 40.4, 21.0 | 86.6, 80.9, 92.0 | 10.3, 6.8, 38.3 | 0.662 |
| **4** | **-9013.9** | **49.1, 10.6, 30.6, 9.7** | **51.7, 11.7, 28.5, 8.1** | **89.4, 78.4, 83.9, 90.8** | **8.7, 30.7, 11.9, 91.9** | **0.730** |
| 5 | Did not converge |  |  |  |  |  |
| **Anxiety** |  |  |  |  |  |  |
| Number of classes |  |  |  |  |  |  |
| 1 | -8820.4 | 100 | 100 | 100 | n/a | n/a |
| 2 | -8441.6 | 82.2, 17.8 | 84.9, 15.1 | 94.9, 89.4 | 4.0, 38.8 | 0.772 |
| **3** | **-8294.9** | **58.1, 32.6, 9.3** | **59.4, 32.9, 7.7** | **89.5, 79.3, 91.7** | **6.1, 7.9, 107.8** | **0.688** |
| 4 | -8260.7 | 60.6, 12.0, 20.7, 6.7 | 62.8, 12.2, 19.3, 5.6 | 90.7, 68.2, 79.2, 89.6 | 6.3, 15.7, 14.6, 121.5 | 0.715 |
| **Stress** |  |  |  |  |  |  |
| Number of classes |  |  |  |  |  |  |
| 1 | -12488.2 | 100 | 100 | 100 | n/a | n/a |
| 2 | -12041.4 | 67.0, 33.0 | 70.4, 29.6 | 91.1, 90.0 | 5.0, 18.2 | 0.683 |
| 3 | -11805.9 | 31.6, 48.4, 20.0 | 30.1, 52.1, 17.8 | 89.3, 83.6, 90.2 | 18.0, 5.4, 36.7 | 0.692 |
| **4 classes** | **-11752.4** | **20.8, 30.0, 36.4, 12.8** | **19.8, 32.2, 36.9, 11.1** | **84.5, 73.6, 80.9, 88.8** | **20.8, 6.5, 7.4, 54.0** | **0.648** |
| 5 classes | -11741.7 | 20.7, 18.4, 32.6, 22.1, 6.3 | 20.0, 18.7, 36.1, 20.0, 5.2 | 82.1, 67.0, 71.9, 77.5, 84.8 | 17.7, 9.0, 5.3, 12.2, 82.6 | 0.618 |

A quadratic shape is assumed for all classes, bold text indicates the selected model.

Abbreviations: BIC, Bayesian Information Criterion (larger BIC indicates better model fit).

a Ordered by lowest trajectory to highest trajectory.

**eTable 4. Trajectory Shapes, Model Fit and Diagnostic Criteria for the Final Model Trajectories**

| **Trajectory Class** | **Trajectory Shape** | **Estimated class proportions (%)**  **(95% CI)** | **Assigned membership**  **n (%)** | **Average posterior probability**  **(%)** | **Odds of correct classification** | **BICa** | **Entropy** |
| --- | --- | --- | --- | --- | --- | --- | --- |
| **Depression** |  |  |  |  |  |  |  |
| Very low stable | quadratic | 48.0 (45.7-50.2) | 709 (50.4%) | 89.0 | 8.7 | -9000.8 | 0.726 |
| Low stable | intercept | 12.4 (11.0-13.8) | 194 (13.8%) | 76.6 | 23.0 |
| Medium increasing | linear | 30.2 (28.3-32.0) | 395 (28.1%) | 84.2 | 12.3 |
| High increasing | linear | 9.4 (8.1-10.7) | 109 (7.8%) | 91.4 | 102.5 |
| **Anxiety** |  |  |  |  |  |  |  |
| Low stable | quadratic | 58.1 (56.0-60.2) | 836 (59.4%) | 89.5 | 6.2 | -8291.7 | 0.689 |
| Medium | quadratic | 32.6 (30.8-34.5) | 463 (32.9%) | 79.4 | 7.9 |
| High increasing | linear | 9.2 (7.9-10.5) | 108 (7.7%) | 91.6 | 107.5 |
| **Stress** |  |  |  |  |  |  |  |
| Very low stable | intercept | 21.4 (19.6-23.2) | 303 (21.6%) | 81.2 | 15.9 | -11739.7 | 0.646 |
| Low stable | linear | 29.2 (27.5-30.9) | 427 (30.4%) | 73.4 | 6.7 |
| Medium increasing | linear | 36.5 (34.5-38.4) | 514 (36.6%) | 81.3 | 7.6 |
| High increasing | linear | 12.9 (11.4-14.4) | 159 (11.3%) | 88.5 | 51.7 |

Abbreviations: BIC, Bayesian Information Criterion.

**eTable 5. Descriptive Statistics of DASS Scores at Each Timepoint for Each Trajectory Class**

|  | **Timepoint**  **mean (SD)**  **median (IQR)** | | | |
| --- | --- | --- | --- | --- |
| **Depression** | **Antenatal**  **n=1407** | **6 months postnatally**  **n=1052** | **1 year postnatally**  **n=1013** | **2 years postnatally**  **n=611** |
| Total sample  n=1407 | 3.2 (4.6)  2 (0-4) | 3.5 (5.1)  2 (0-4) | 3.8 (5.9)  2 (0-4) | 4.2 (6.1)  2 (0-6) |
| Very low stable class  n=709 | 1.0 (1.6)  0 (0-2) | 0.8 (1.5)  0 (0-2) | 0.6 (1.2)  0 (0-0) | 0.9 (1.7)  0 (0-2) |
| Low stable class  n=194 | 2.5 (1.1)  2 (2-4) | 2.5 (1.0)  2 (2-2) | 2.6 (1.0)  2 (2-4) | 2.4 (1.1)  2 (2-4) |
| Medium increasing class  n=395 | 5.0 (4.1)  4 (2-8) | 6.1 (3.7)  6 (4-8) | 6.2 (4.1)  6 (2-8) | 6.9 (4.4)  6 (4-10) |
| High increasing class  n=109 | 12.1 (8.6)  10 (6-18) | 14.4 (9.6)  14 (6-20) | 17.2 (9.1)  16 (12-24) | 21.1 (8.2)  22 (16-26) |
| **Anxiety** | **Antenatal**  **n=1407** | **6 months postnatally**  **n=1059** | **1 year postnatally**  **n=1003** | **2 years postnatally**  **n=613** |
| Total sample  n=1407 | 3.6 (4.5)  2 (0-6) | 2.4 (4.4)  0 (0-2) | 2.7 (4.6)  0 (0-4) | 3.3 (5.1)  2 (0-4) |
| Low stable class  n=836 | 1.5 (2.2)  0 (0-2) | 0.5 (1.2)  0 (0-0) | 0.5 (1.1)  0 (0-0) | 0.9 (1.7)  0 (0-2) |
| Medium class  n=463 | 5.6 (3.5)  4 (2-8) | 3.7 (3.0)  2 (2-6) | 3.9 (2.8)  4 (2-6) | 5.0 (3.3)  4 (2-8) |
| High increasing class  n=108 | 11.4 (8.0)  10 (6-16) | 12.4 (9.2)  12 (6-16) | 13.8 (7.7)  14 (10-18) | 16.3 (8.1)  16 (10-22) |
| **Stress** | **Antenatal**  **n=1403** | **6 months postnatally**  **n=1048** | **1 year postnatally**  **n=1006** | **2 years postnatally**  **n=611** |
| Total sample  n=1403 | 6.8 (6.3)  6 (2-10) | 7.7 (7.4)  6 (2-12) | 8.6 (7.7)  8 (2-12) | 9.0 (8.2)  8 (2-12) |
| Very low stable class  n=303 | 1.7 (3.5)  0 (0-2) | 1.1 (2.6)  0 (0-0) | 1.1 (2.6)  0 (0-0) | 1.3 (2.9)  0 (0-2) |
| Low stable class  n=427 | 3.9 (2.8)  4 (2-6) | 4.6 (2.8)  4 (2-6) | 4.8 (2.9)  4 (2-6) | 5.3 (3.2)  6 (4-8) |
| Medium increasing class  n=514 | 9.4 (4.6)  10 (6-12) | 10.6 (4.4)  10 (8-14) | 11.1 (4.6)  10 (8-14) | 12.1 (5.2)  12 (8-16) |
| High increasing class  n=159 | 16.0 (8.0)  14 (12-22) | 21.0 (9.4)  22 (14-26) | 22.2 (7.7)  22 (18-28) | 25.7 (8.8)  26 (20-32) |

**eTable 6. Characteristics of Those Included and Excluded from the Conners Analyses**

|  | Includeda  n=510 pregnancies | Excludedb  n=932 pregnancies |
| --- | --- | --- |
| Mother’s age at birth of child, mean (SD), years | 32.8 (4.3) | 32.7 (4.3) |
| Socioeconomic status: IRSAD (quintiles), n (%)c |  |  |
| 1, most disadvantaged | 26 (5.1%) | 45 (4.8%) |
| 2 | 15 (2.9%) | 24 (2.6%) |
| 3 | 94 (18.4%) | 150 (16.1%) |
| 4 | 181 (35.5%) | 362 (38.9%) |
| 5, least disadvantaged | 194 (38.0%) | 349 (37.5%) |
| Mother’s education, n (%)d |  |  |
| High School | 88 (17.5%) | 194 (20.9%) |
| Trade/Apprenticeship/Diploma | 107 (21.3%) | 183 (19.8%) |
| University degree | 308 (61.2%) | 543 (58.6%) |
| Other | 0 (0.0%) | 6 (0.6%) |
| Mother’s ethnic origin, n (%)e |  |  |
| Africa | 5 (1.0%) | 22 (2.4%) |
| America | 8 (1.6%) | 17 (1.9%) |
| Asia | 30 (6.2%) | 87 (9.5%) |
| Australia | 112 (23.0%) | 255 (28.0%) |
| Britain | 227 (46.6%) | 316 (34.6%) |
| Europe | 64 (13.1%) | 115 (12.6%) |
| Ireland | 26 (5.3%) | 67 (7.4%) |
| New Zealand | 13 (2.7%) | 27 (3.0%) |
| Other | 2 (0.4%) | 6 (0.7%) |
| Antenatal DASS depression score |  |  |
| mean (SD) | 3.0 (4.7) | 3.3 (4.6) |
| median (IQR) | 2 (0-4) | 2 (0-4) |
| Antenatal DASS anxiety score |  |  |
| mean (SD) | 3.4 (4.7) | 3.7 (4.4) |
| median (IQR) | 2 (0-4) | 2 (0-6) |
| Antenatal DASS stress score |  |  |
| mean (SD) | 6.7 (6.0) | 6.9 (6.5) |
| median (IQR) | 6 (2-10) | 6 (2-10) |
| Gestation at birth, median (IQR), weeks | 39.1 (38.4-40.1) | 39.2 (38.6-40.1) |
| Child’s sexf |  |  |
| Male | 249 (48.8%) | 483 (51.0%) |
| Female | 261 (51.2%) | 465 (49.0%) |

Abbreviations: IRSAD, Index of Relative Socio-Economic Advantage and Disadvantage. This index summarizes information about the economic and social conditions of people and households within an area, including both relative advantage and disadvantage measures.

a 510 pregnancies, 510 children.

b 932 pregnancies, (950 children) excluded because of ineligibility (child had not yet reached the age of 3, n=592) or missing Conners data (n=344). A further 14 were excluded as they were not singleton.

c missing data, n=2.

d missing data, n=13.

e missing data, n=43; ‘Other’ includes ethnicities not listed separately. Specific categories and cell counts are not shown because small numbers could risk participant identification.

f missing data, n=2.

**eTable 7. Univariate Association of Covariates with Offspring Conners Domains**

|  | **Child anxiety** | | | **Child mood and affect** | | | **Child emotional lability** | | |
| --- | --- | --- | --- | --- | --- | --- | --- | --- | --- |
|  | **β**  **(95% CI)** | ***P* value** | **Overall *P* value** | **β**  **(95% CI)** | ***P* value** | **Overall *P* value** | **β**  **(95% CI)** | ***P* value** | **Overall *P* value** |
| Mother’s age (at birth of child) | -0.28  (-0.53 to -0.03) | .03 | .03 | -0.31  (-0.54 to -0.09) | .007 | .007 | -0.33  (-0.55 to -0.10) | .005 | .005 |
| Mother’s education |  |  |  |  |  |  |  |  |  |
| High School | (ref) | NA | .07 | (ref) | NA | .12 | (ref) | NA | .07 |
| Trade/Apprenticeship/Diploma | 2.48  (-0.90 to 5.86) | .15 | -0.03  (-3.36 to 3.31) | .99 | 0.11  (-3.26 to 3.48) | .95 |
| University degree | 3.10  (0.45 to 5.76) | .02 | 2.17  (-0.64 to 4.98) | 0.13 | 2.61  (-0.11 to 5.33) | .06 |
| Socioeconomic status: IRSAD quintiles |  |  |  |  |  |  |  |  |  |
| 1, most disadvantaged/lack of advantage | 1.19  (-3.37 to 5.75) | .61 | .82 | -0.27  (-4.40 to 3.85) | .90 | .88 | -3.31  (-7.41 to 0.78) | .11 | .47 |
| 2 | 1.73  (-4.75 to 8.21) | .61 | -1.09  (-5.13 to 2.94) | .60 | -1.65  (-6.36 to 3.07) | .49 |
| 3 | -1.09  (-4.20 to 2.02) | .49 | -1.52  (-4.42 to 1.37) | .30 | -1.94  (-4.81 to 0.93) | .19 |
| 4 | -0.69  (-3.19 to 1.80) | .59 | -0.32  (-2.78 to 2.13) | .79 | -0.95  (-3.52 to 1.62) | .47 |
| 5, least disadvantaged/most advantaged | (ref) | NA | (ref) | NA |  | (ref) | NA |
| Gestation at birth | 0.34  (-0.48 to 1.15) | .42 | .42 | -0.23  (-1.06 to 0.60) | .58 | .58 | -0.17  (-1.09 to 0.74) | .71 | .71 |
| Child’s sex |  |  |  |  |  |  |  |  |  |
| Male | (ref) | NA | .33 | (ref) | NA | .97 | (ref) | NA | .99 |
| Female | -1.07  (-3.22 to 1.08) | .33 | 0.05  (-2.01 to 2.10) | .97 | -0.01  (-2.14 to 2.12) | .99 |

Abbreviations: IRSAD, Index of Relative Socio-Economic Advantage and Disadvantage. This index summarizes information about the economic and social conditions of people and households within an area, including both relative advantage and disadvantage measures.

**eTable 8. Unadjusted Associations of Maternal DASS Trajectories with Offspring Conners Domains**

|  |  | **Child anxiety** | | | **Child mood and affect** | | | **Child emotional lability** | | |
| --- | --- | --- | --- | --- | --- | --- | --- | --- | --- | --- |
|  | **Trajectory class** | **median**  **(IQR)** | **β**  **(95% CI)** | ***P* value** | **median**  **(IQR)** | **β**  **(95% CI)** | ***P* value** | **median**  **(IQR)** | **β**  **(95% CI)** | ***P* value** |
| **Depression** | Very low stable  (n=254) | 51  (45-60) | (ref) | NA | 54  (48, 60) | (ref) | NA | 54  (47-61) | (ref) | NA |
| Low stable  (n=73) | 54  (49-64) | 3.96  (0.98 to 6.94) | .009 | 57  (51-63) | 5.46  (2.22 to 8.71) | .001 | 60  (53-66) | 4.56  (1.41 to 7.71) | .005 |
| Medium increasing  (n=152) | 57  (50-69.5) | 7.40  (4.90 to 9.90) | <.001 | 59  (53-67) | 6.20  (4.01 to 8.38) | <.001 | 60  (53-66) | 4.58  (2.22 to 6.93) | <.001 |
| High increasing  (n=27) | 64  (53-75) | 12.51  (7.23 to 17.79) | <.001 | 59  (54-74) | 10.67  (4.90 to 16.44) | <.001 | 61  (53-82) | 8.98  (2.59 to 15.37) | .006 |
| **Anxiety** | Low stable  (n=310) | 52  (46-60) | (ref) | NA | 54  (50-60) | (ref) | NA | 54  (47-61) | (ref) | NA |
| Medium  (n=164) | 56  (49.5-66) | 4.74  (2.53 to 6.95) | <.001 | 59  (53-65) | 4.69  (2.52 to 6.86) | <.001 | 60  (53-66) | 4.05  (1.79 to 6.32) | .001 |
| High increasing  (n=34) | 72.5  (53-83) | 15.68  (10.30 to 21.07) | <.001 | 66.5  (56-86) | 12.03  (6.79 to 17.27) | <.001 | 64  (54-82) | 10.84  (5.51 to 16.17) | .001 |
| **Stress** | Very low stable  (n=94) | 50  (44-56) | (ref) | NA | 53  (47-60) | (ref) | NA | 53  (47-61) | (ref) | NA |
| Low stable  (n=158) | 52  (46-62) | 3.07  (0.69 to 5.48) | .01 | 54  (50-60) | 1.32  (-1.38 to 4.01) | .34 | 54  (47-61) | 1.58  (-1.28 to 4.45) | .28 |
| Medium increasing  (n=201) | 56  (49-66) | 7.50  (5.07 to 9.92) | <.001 | 59  (51-65) | 5.99  (3.24 to 8.75) | <.001 | 60  (53-66) | 5.54  (2.69 to 8.40) | <.001 |
| High increasing  (n=48) | 66  (53-81) | 15.69  (11.17 to 20.20) | <.001 | 61.5  (53.5-75.5) | 11.93  (7.06 to 16.79) | <.001 | 61.5  (48-80.5) | 9.90  (4.78 to 15.01) | <.001 |

For all 9 models the overall *P* <.001 (Wald test).
